# Supplementary material for: Using Bayesian state-space models to understand the population dynamics of the dominant malaria vector, Anopheles funestus in rural Tanzania
Source: PubMed Central journal article supplement (PMC9166306; doi:10.1186/s12936-022-04189-4), 2022-06-03

## Supplementary information

### Using Bayesian state-space models to understand the population dynamics of the dominant malaria vector, *Anopheles funestus* in rural Tanzania

Halfan S. Ngowo<sup>1,2\*</sup>, Fredros O. Okumu<sup>1,2,3,4</sup>, Emmanuel E. Hape<sup>1,2</sup>, Issa H. Mshani<sup>1,2</sup>, Heather M. Ferguson<sup>1,2</sup>, Jason Matthiopoulos<sup>2</sup>

\* Corresponding author

#### Affiliations

1. Department of Environmental Health & Ecological Sciences, Ifakara Health Institute, Tanzania
2. Institute of Biodiversity, Animal Health and Comparative Medicine, University of Glasgow, United Kingdom
3. School of Public Health, University of the Witwatersrand, Republic of South Africa
4. School of Life Science and Bioengineering, Nelson Mandela African Institution of Science & Technology, Tanzania

#### Email address:

1. Halfan Ngowo: [hngowo@ihi.or.tz](mailto:hngowo@ihi.or.tz)
2. Fredros Okumu: [fredros@ihi.or.tz](mailto:fredros@ihi.or.tz)
3. Emmanuel Hape: [ehape@ihi.or.tz](mailto:ehape@ihi.or.tz)
4. Issa Mshani: [imshani@ihi.or.tz](mailto:imshani@ihi.or.tz)
5. Heather Ferguson: [Heather.Ferguson@glasgow.ac.uk](mailto:Heather.Ferguson@glasgow.ac.uk)
6. Jason Matthiopoulos: [Jason.Matthiopoulos@glasgow.ac.uk](mailto:Jason.Matthiopoulos@glasgow.ac.uk)

S1: JAGS code

```
##### 1. Jags model#####
```

```
popMod2<-"model{
```

```
  #Multiple trajectory
```

```
  for(i in 1:Ntr){
```

```
    ###MAIN LOOP###
```

```
    #Supply the initial values
```

```
    Ieggs[i,1]~dunif(0,3000)
```

```
    ILarvae[i,1]~dunif(0,3000)
```

```
    Ipupae[i,1]~dunif(0,3000)
```

```
    Iadult[i,1]~dunif(0,1000)
```

```
    Iblood_fed[i,1]~dunif(0,1000)
```

```
    Igravid[i,1]~dunif(0,100)
```

```
    IgraG[i,1]~dunif(0,100)
```

```
    eggs[i,1]<-round(Ieggs[i,1])
```

```
    larvae[i,1]<-round(ILarvae[i,1])
```

```
    pupae[i,1]<-round(Ipupae[i,1])
```

```
    adult[i,1]<-round(Iadult[i,1])
```

```
    blood_fed[i,1]<-round(Iblood_fed[i,1])
```

```
    gravid[i,1]<-round(Igravid[i,1])
```

```
    graG[i,1]<-round(IgraG[i,1])
```

```
    ####Start of the time loop####
```

```
    for(t in 2:(tmax))
```

```
    {
```

```
      LarE[i,t]~dnorm(0,precLE+1)
```

```
      pupE[i,t]~dnorm(0,precPE+1)
```

```
      aduE[i,t]~dnorm(0,precAE+1)
```

```
      bLoE[i,t]~dnorm(0,precAE+1)
```

```
      graE[i,t]~dnorm(0,precAE+1)
```

```
      breE[i,t]~dnorm(0,precBE+1)
```

```
      #Effect of density dependence, rainfall and temperature on Larvae survival
```

```
      Logit(spv[i,t])<-sLInv + PrTempLs*Temp[i,t-1] + PrTemps*Temp[i,t-1]^2 - Pr  
_dd*prec[i,t-1] - larvae[i,t-1]*Ldd*(1 - Pr_dd3*prec3[i,t-1]/max(prec3))+LarE[i,  
t]
```

```
      LarS[i,t] ~ dbin(spv[i,t], larvae[i,t-1])
```

```
      Logit(spu[i,t])<-sp0+pupE[i,t]
```

```
      pupS[i,t] ~ dbin(spu[i,t], pupae[i,t-1])
```

```
      #seasonality into adult-unfed
```

```
      Logit(sav[i,t])<-saInv + 0*Temp[i,t-1] + 0*Temp[i,t-1]^2+aduE[i,t]
```

```
      aduS[i,t] ~ dbin(sav[i,t], adult[i,t-1])
```

```

#seasonality into adult-bloodfed
Logit(sbv[i,t])<-sbInv + 0*Temp[i,t-1] + 0*Temp[i, t-1]^2+bloE[i,t]
bloS[i,t] ~ dbin(sbv[i,t], blood_fed[i,t-1])

#seasonality into adult-gravid
Logit(sgv[i,t])<-sgInv + 0*Temp[i,t-1] + 0*Temp[i, t-1]^2+graE[i,t]
graS[i,t] ~ dbin(sgv[i,t], gravid[i,t-1])

#Growth for each stage
eggG[i,t] ~ dbin(lambda, eggs[i,t-1])

#Positive effect of temp on Larval growth
Logit(lgv[i,t]) <- lrInv + PrTempLg*(Temp[i,t-1]-27)
larG[i,t] ~ dbin(lgv[i,t], larS[i,t])

pupG[i,t] ~ dbin(pr, pupS[i,t])

aduG[i,t] ~ dbin(ar, aduS[i,t])

bloG[i,t] ~ dbin(bfr, bloS[i,t])

graG[i,t] ~ dbin(gr, graS[i,t])

#fecundity penalised by egg survival
Log(bre[i,t])<-bre0+breE[i,t]
fec[i,t] ~ dpois(se*0.5*bre[i,t]*graG[i,t-1])

# Propagation of population classes through time (no class is allowed to go
extinct, hence the +1)
eggs[i,t] <-eggs[i,t-1]-eggG[i,t]+fec[i,t]+1
larvae[i,t] <- larS[i,t]-larG[i,t]+eggG[i,t]+1
pupae[i,t] <- pupS[i,t]-pupG[i,t]+larG[i,t]+1
adult[i,t] <- aduS[i,t]-aduG[i,t]+pupG[i,t] + graG[i,t]+1
blood_fed[i,t] <- bloS[i,t]-bloG[i,t]+aduG[i,t]+1
gravid[i,t] <- graS[i,t]-graG[i,t]+bloG[i,t]+1

#Observation process model
# Observaton likelihoods against real data
adultD[i,t] ~ dnorm(ef0[i,efLev[t]]*adult[i,t], 1/(seAd[i,t])^2)T(0,)
blood_fedD[i,t] ~ dnorm(ef0[i,efLev[t]]*blood_fed[i,t]*ef1, 1/(seBf[i,t])^2
)T(0,)
gravidD[i,t] ~ dnorm(ef0[i,efLev[t]]*gravid[i,t]*ef2, 1/(seGr[i,t])^2)T(0,)

# Predictions (no data) used to generate prediction intervals for plotting
Later
adultd[i,t] ~ dnorm(ef0[i,efLev[t]]*adult[i,t], 1/(seAd[i,t])^2)T(0,)
blood_fedd[i,t] ~ dnorm(ef0[i,efLev[t]]*blood_fed[i,t]*ef1, 1/(seBf[i,t])^2
)T(0,)

```

```

gravidd[i,t] ~ dnorm(ef0[i,efLev[t]]*gravid[i,t]*ef2, 1/(seGr[i,t])^2)T(0,)

# Modelling the standard errors for the weekly mean counts.
seAd[i,t]<-1e-6+ef0[i,efLev[t]]*adult[i,t]*cva[i]
seBf[i,t]<-1e-6+ef0[i,efLev[t]]*blood_fed[i,t]*ef1*cva[i]
seGr[i,t]<-1e-6+ef0[i,efLev[t]]*gravid[i,t]*ef2*cva[i]

} #End of time loop

} #End of trajectory loop

#Density dependence at Larval stage (Determines carrying capacity)
Ldd ~ dgamma(0.5,1)T(0.0001,10)

# Precisions for stochasticity in survival rates
precLE~dgamma(10,1)
precPE~dgamma(10,1)
precAE~dgamma(10,1)
precBE~dgamma(10,1)

# Scaling parameters for all beta priors
b1<-100
b2<-100
b3<-2
b4<-2

#Prior for coefficient of variation in trapping
mu.cva<-0.5
sd.cva<-0.4/b3
cvamax<-mu.cva+b4*sd.cva
cvamin<-max(0, mu.cva-b4*sd.cva)
cvae[1]~dbeta(b1, b2)
cva[1]<-cvamin+cvae[1]*(cvamax-cvamin)
cvae[2]~dbeta(b1, b2)
cva[2]<-cvamin+cvae[2]*(cvamax-cvamin)

ef0[1,1]<-0.5

dev[2,1]~dnorm(0,10)
ef0[2,1]<-0.1*exp(dev[2,1])/(1+exp(dev[2,1]))

for( day in 2:7)
{
  dev[1,day]~dnorm(0,10)
  Logit(ef0[1,day])<-dev[1,day]
  dev[2,day]~dnorm(0,10)
}

```

```
ef0[2, day]<-0.1*exp(dev[2, day])/(1+exp(dev[2, day]))
}
```

```
# CDC trap effectiveness for blood fed
```

```
mu.ef1<-0.1
sd.ef1<-0.05/b3
efmax1<-min(1, mu.ef1+b4*sd.ef1)
efmin1<-max(0, mu.ef1-b4*sd.ef1)
efe1~dbeta(b1, b2)
ef1<-efmin1+efe1*(efmax1-efmin1)
```

```
ef2<-0.505*ef1
```

```
#Proportion eggs survived (literature)
```

```
mu.se<- 0.7940
sd.se<- 0.101/b3
semax<-min(1, mu.se+b4*sd.se)
semin<-max(0, mu.se-b4*sd.se)
see~dbeta(b1, b2)
se<-semin+see*(semax-semin)
```

```
#Hatching period
```

```
mu.Lam<- 0.5
sd.Lam<- 0.1/b3
Lamax<-min(1, mu.Lam+b4*sd.Lam)
Lammin<-max(0, mu.Lam-b4*sd.Lam)
Lamm~dbeta(b1, b2)
Lambda<-Lammin+Lamm*(Lamax-Lammin)
```

```
#Survival rates pupae
```

```
mu.sp<-0.9414
sd.sp<-0.0339/b3
spmax<-min(1, mu.sp+b4*sd.sp) #spmax goes to 1.0092
spmin<-max(0, mu.sp-b4*sd.sp)
spp~dbeta(b1, b2)
sp<-spmin+spp*(spmax-spmin)
sp0<-Log(sp/(1-sp))
```

```
#Survival rates adults/unfed
```

```
mu.sa<-0.9348
sd.sa<-0.0288/b3
samax<-min(1, mu.sa+b4*sd.sa)
samin<-max(0, mu.sa-b4*sd.sa)
saa~dbeta(b1, b2)
sa<-samin+saa*(samax-samin)
saInv0<-Log(sa/(1-sa))
```

```
#Survival rates blood-fed
```

```

mu.sb<-0.8074
sd.sb<-0.0766/b3
sbmax<-min(1, mu.sb+b4*sd.sb)
sbmin<-max(0, mu.sb-b4*sd.sb)
sbb~dbeta(b1, b2)
sb<-sbmin+sbb*(sbmax-sbmin)
sbInv0<-Log(sb/(1-sb))

#Survival rates gravid
mu.sg<-0.9041
sd.sg<-0.0282/b3
sgmax<-min(1, mu.sg+b4*sd.sg)
sgmin<-max(0, mu.sg-b4*sd.sg)
sgg~dbeta(b1, b2)
sg<-sgmin+sgg*(sgmax-sgmin)
sgInv0 <-Log(sg/(1-sg))

#Seasonality in adult survival (Temperature)
ATopt<-27 # Optimal temperature for adult survival
PrTempa~dgamma(25,0.5) # Linear term coefficient
PrTempas<- -PrTempa/(2*ATopt) # Quadratic term coefficient
saInv <-saInv0-PrTempa*ATopt/2 # Ensures that the maximum survival is mu.sa
sbInv <-sbInv0-PrTempa*ATopt/2 # Ensures that the maximum survival is mu.sb
sgInv <-sgInv0-PrTempa*ATopt/2 # Ensures that the maximum survival is mu.sg

#Survial rates Larvae
mu.sl<-0.9226
sd.sl<-0.0610/b3
slmax<-min(1, mu.sl+b4*sd.sl)
slmin<-max(0, mu.sl-b4*sd.sl)
sll~dbeta(b1, b2)
sl<-slmin+sll*(slmax-slmin)
slInv0<-Log(sl/(1-sl))

#Seasonality in Larvae (Temperature)
LTopt<-27 # Optimal temperature
PrTempls~dgamma(10,10) # Linear term coefficient
PrTempls<- -PrTempls/(2*LTopt) # Quadratic term coefficient
slInv<-slInv0-PrTempls*LTopt/2 # Ensures that the maximum survival is mu.sl

#Growth rates Larvae
mu.lr<-0.0629
sd.lr<-0.0038/b3
lrmax<-min(1, mu.lr+b4*sd.lr)
lrmin<-max(0, mu.lr-b4*sd.lr)
lrr~dbeta(b1, b2)
lr<-lrmin+lrr*(lrmax-lrmin)
lrInv<-Log(lr/(1-lr))

```

```

# Temperature dependence of Larval growth rate
PrTempLg~dgamma(1,1000) #

#Growth rates pupae
mu.pr<-0.5222
sd.pr<-0.1347/b3
prmax<-min(1, mu.pr+b4*sd.pr)
prmin<-max(0, mu.pr-b4*sd.pr)
prr~dbeta(b1, b2)
pr<-prmin+prr*(prmax-prmin)

#Growth rates adult
mu.ar<- 0.2
sd.ar<-0.01/b3
armax<- min(1, mu.ar+b4*sd.ar) #1
armin<- max(0, mu.ar-b4*sd.ar) #6 days=0.1667
arr~dbeta(b1, b2)
ar<-armin+arr*(armax-armin)

#Growth rates blood-fed
mu.bfr<-0.25
sd.bfr<-0.1/b3
bfrmax<-min(1, mu.bfr+b4*sd.bfr)
bfrmin<-max(0, mu.bfr-b4*sd.bfr)
bfr~dbeta(b1, b2)
bfr<-bfrmin+bfr*(bfrmax-bfrmin)

#Growth rates gravid
mu.gr<-0.3333
sd.gr<-0.1/b3
grmax<-min(1, mu.gr+b4*sd.gr)
grmin<-max(0, mu.gr-b4*sd.gr)
grr~dbeta(b1, b2)
gr<-grmin+grr*(grmax-grmin)

#Number of eggs
mu.b<-80
sd.b<-20/b3
bmax<-mu.b+b4*sd.b
bmin<-max(0, mu.b-b4*sd.b)
br~dbeta(b1, b2)
breed<-bmin+br*(bmax-bmin)
bre0<-Log(breed)

#Effect of precipitation on Larvae
Pr_dd~dgamma(5.382, 46.4)

#Density dependence of Larvae at lag time 3 days rainfall
Pr_dd3~dbeta(7.2,0.8) # Upward-biased prior, towards 1

```

```

#data# blood_fedD, gravidD, adultD, prec, prec3, Temp, tmax, Ntr, efLev

#monitor# breed, se, sp, sa, sb, sg, sl, lr, pr, ar, bfr, gr, lambda, Pr_dd,
Pr_dd3, Ldd, ef1, ef0, precLE, precAE, precBE, precPE
#monitor# PrTempls, PrTemps, PrTemplg, PrTempa, PrTempas, cva
#monitor# eggs, larvae, pupae, adult, blood_fed, gravid
#monitor# spv, sgv, sav, sbv, lgv, lrInv, saInv, sgInv, slInv, sbInv, bre,
bre0
#monitor# adultd, blood_fedd, gravidd

#inits# Ldd

}" #End of the model loop ,

#Data
adultD<-rbind(po$adult, p1$adult)
blood_fedD<-rbind(po$blood_fed, p1$blood_fed)
gravidD<-rbind(po$gravid, p1$gravid)
prec<-rbind(po$Rainfall, p1$Rainfall)
prec3<-rbind(po$RainCuWeek, p1$RainCuWeek)

tmax<-365
Ntr<-2

# Weekly index
efLev<-c(rep(1:7, 52),1)

#Temperature
Temp<-rbind(po$Temp, p1$Temp)

#standard error
seAd<-rbind(po$seAd, p1$seAd)/1
seBf<-rbind(po$seBf, p1$seBf)/1
seGr<-rbind(po$seGr, p1$seGr)/1

##### 2. Model running #####
n.chains=6
Ldd<-list(chain1=c(0.01), chain2=c(0.03),
          chain3=c(0.5), chain4=c(0.05),
          chain5=c(0.01), chain6=c(0.02))

brn=100000 # Burn-in
spl=10000 # Sampling

results <- run.jags(popMod2, n.chains=n.chains, adapt = 1000,
                   burnin=brn, sample=spl, thin=10,
                   method = "parallel")

```



**Figure S2:** Goodness-of-fit: Observed versus predicted unfed, bloodfed and gravid densities across all populations. Adjusted R-squared, intercept and slope values are from a linear model of the predicted against observed values. Dotted lines correspond to 1:1 line. Left column (a,c,d) is data collected from June 2018 to May 2019 and right column (b,d,e) is data from Jan-Dec 2015. Grey area is the period with rainfall.

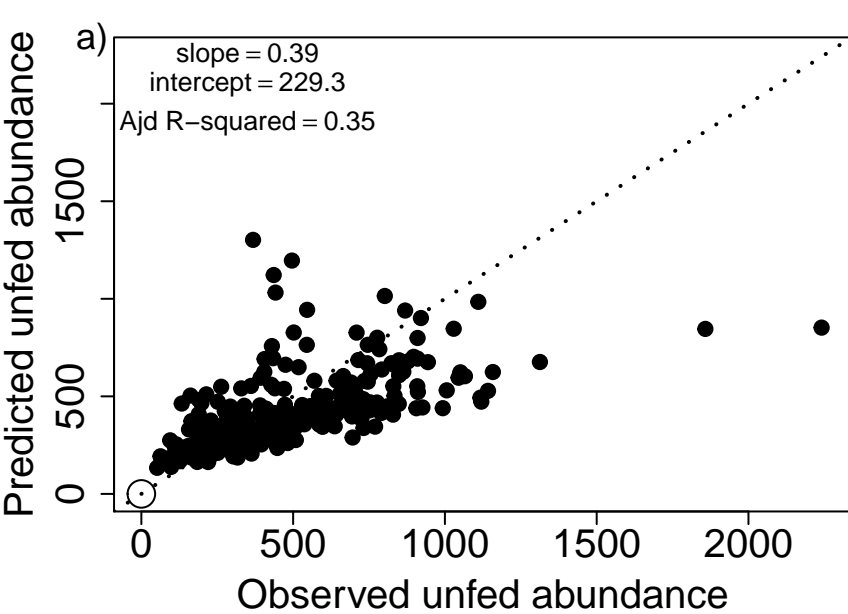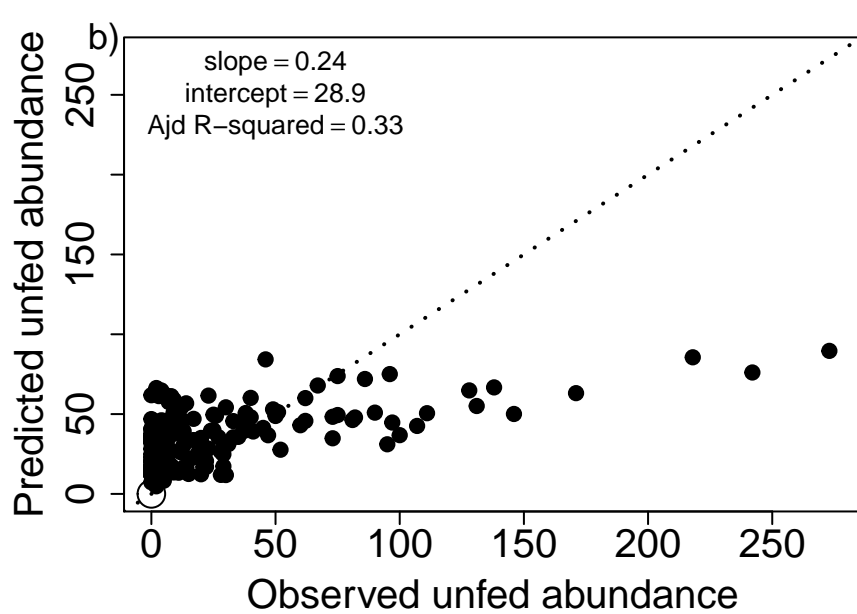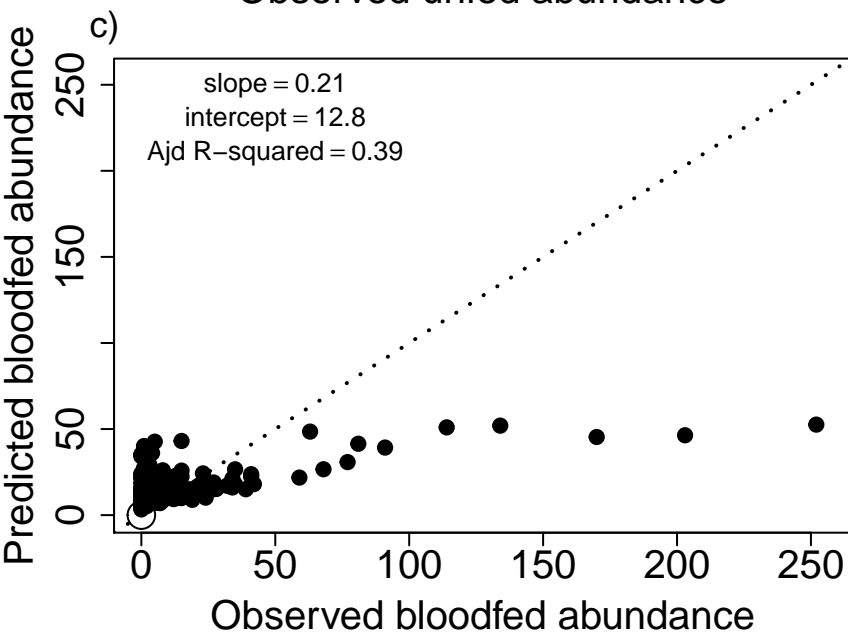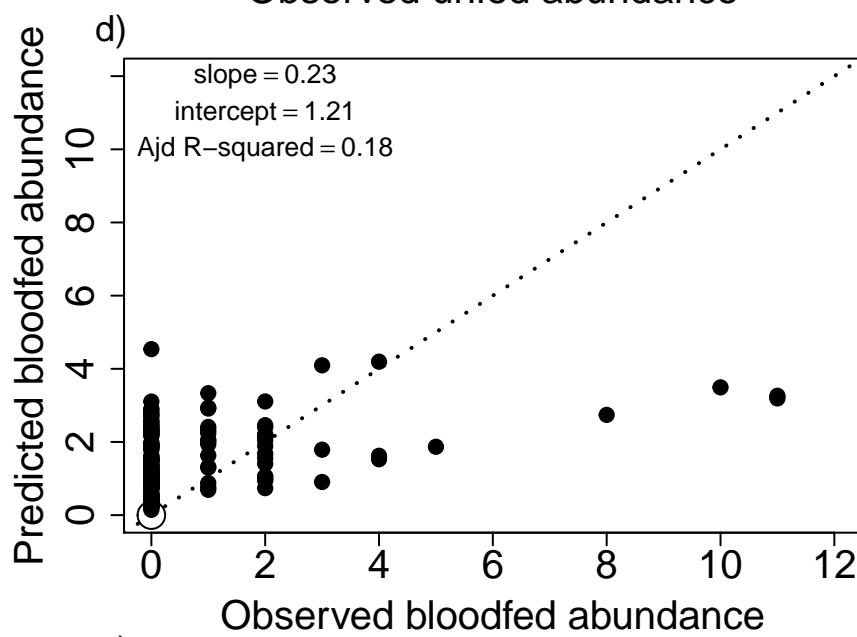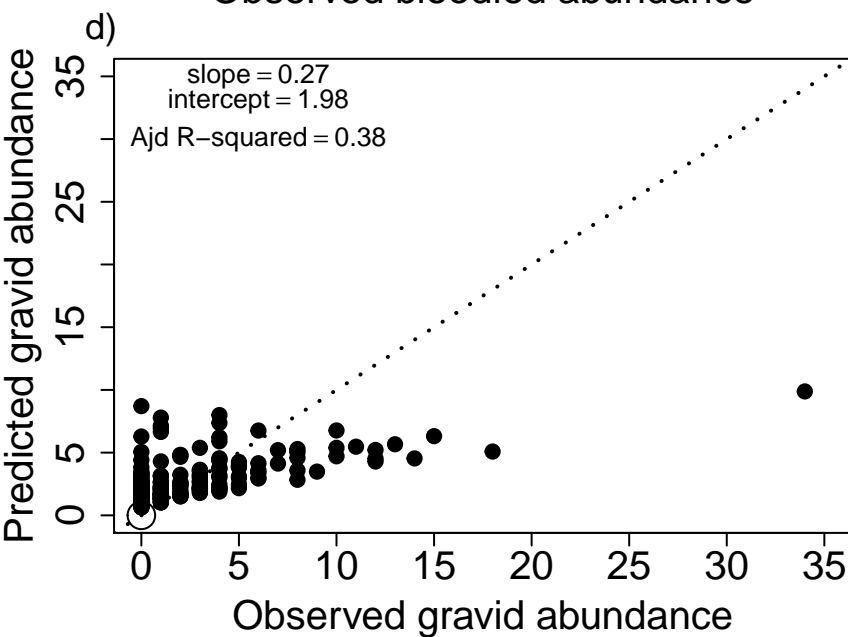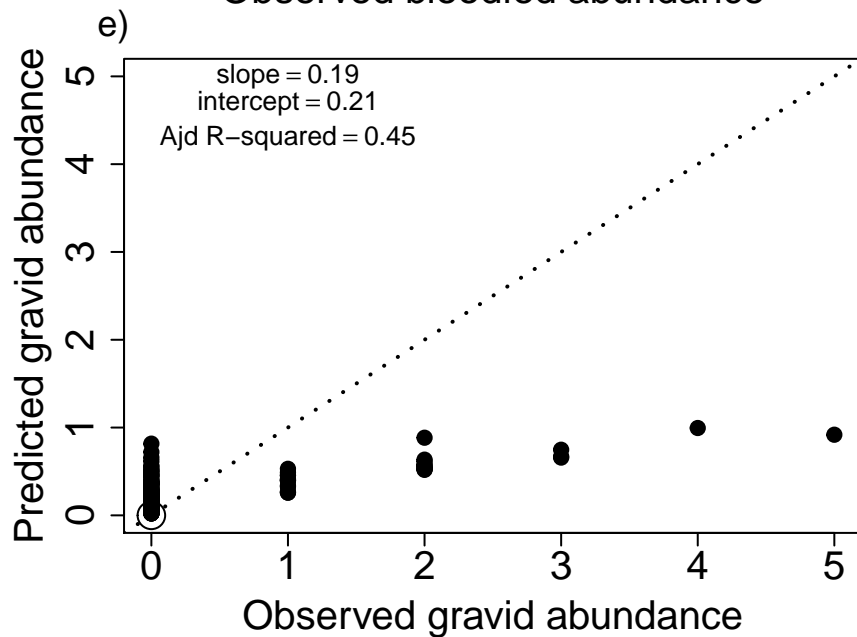

**Figure S3.1:** Prior (orange histogram) and posterior (blue histogram) distribution of the main baseline and observational parameters in the state-space model.

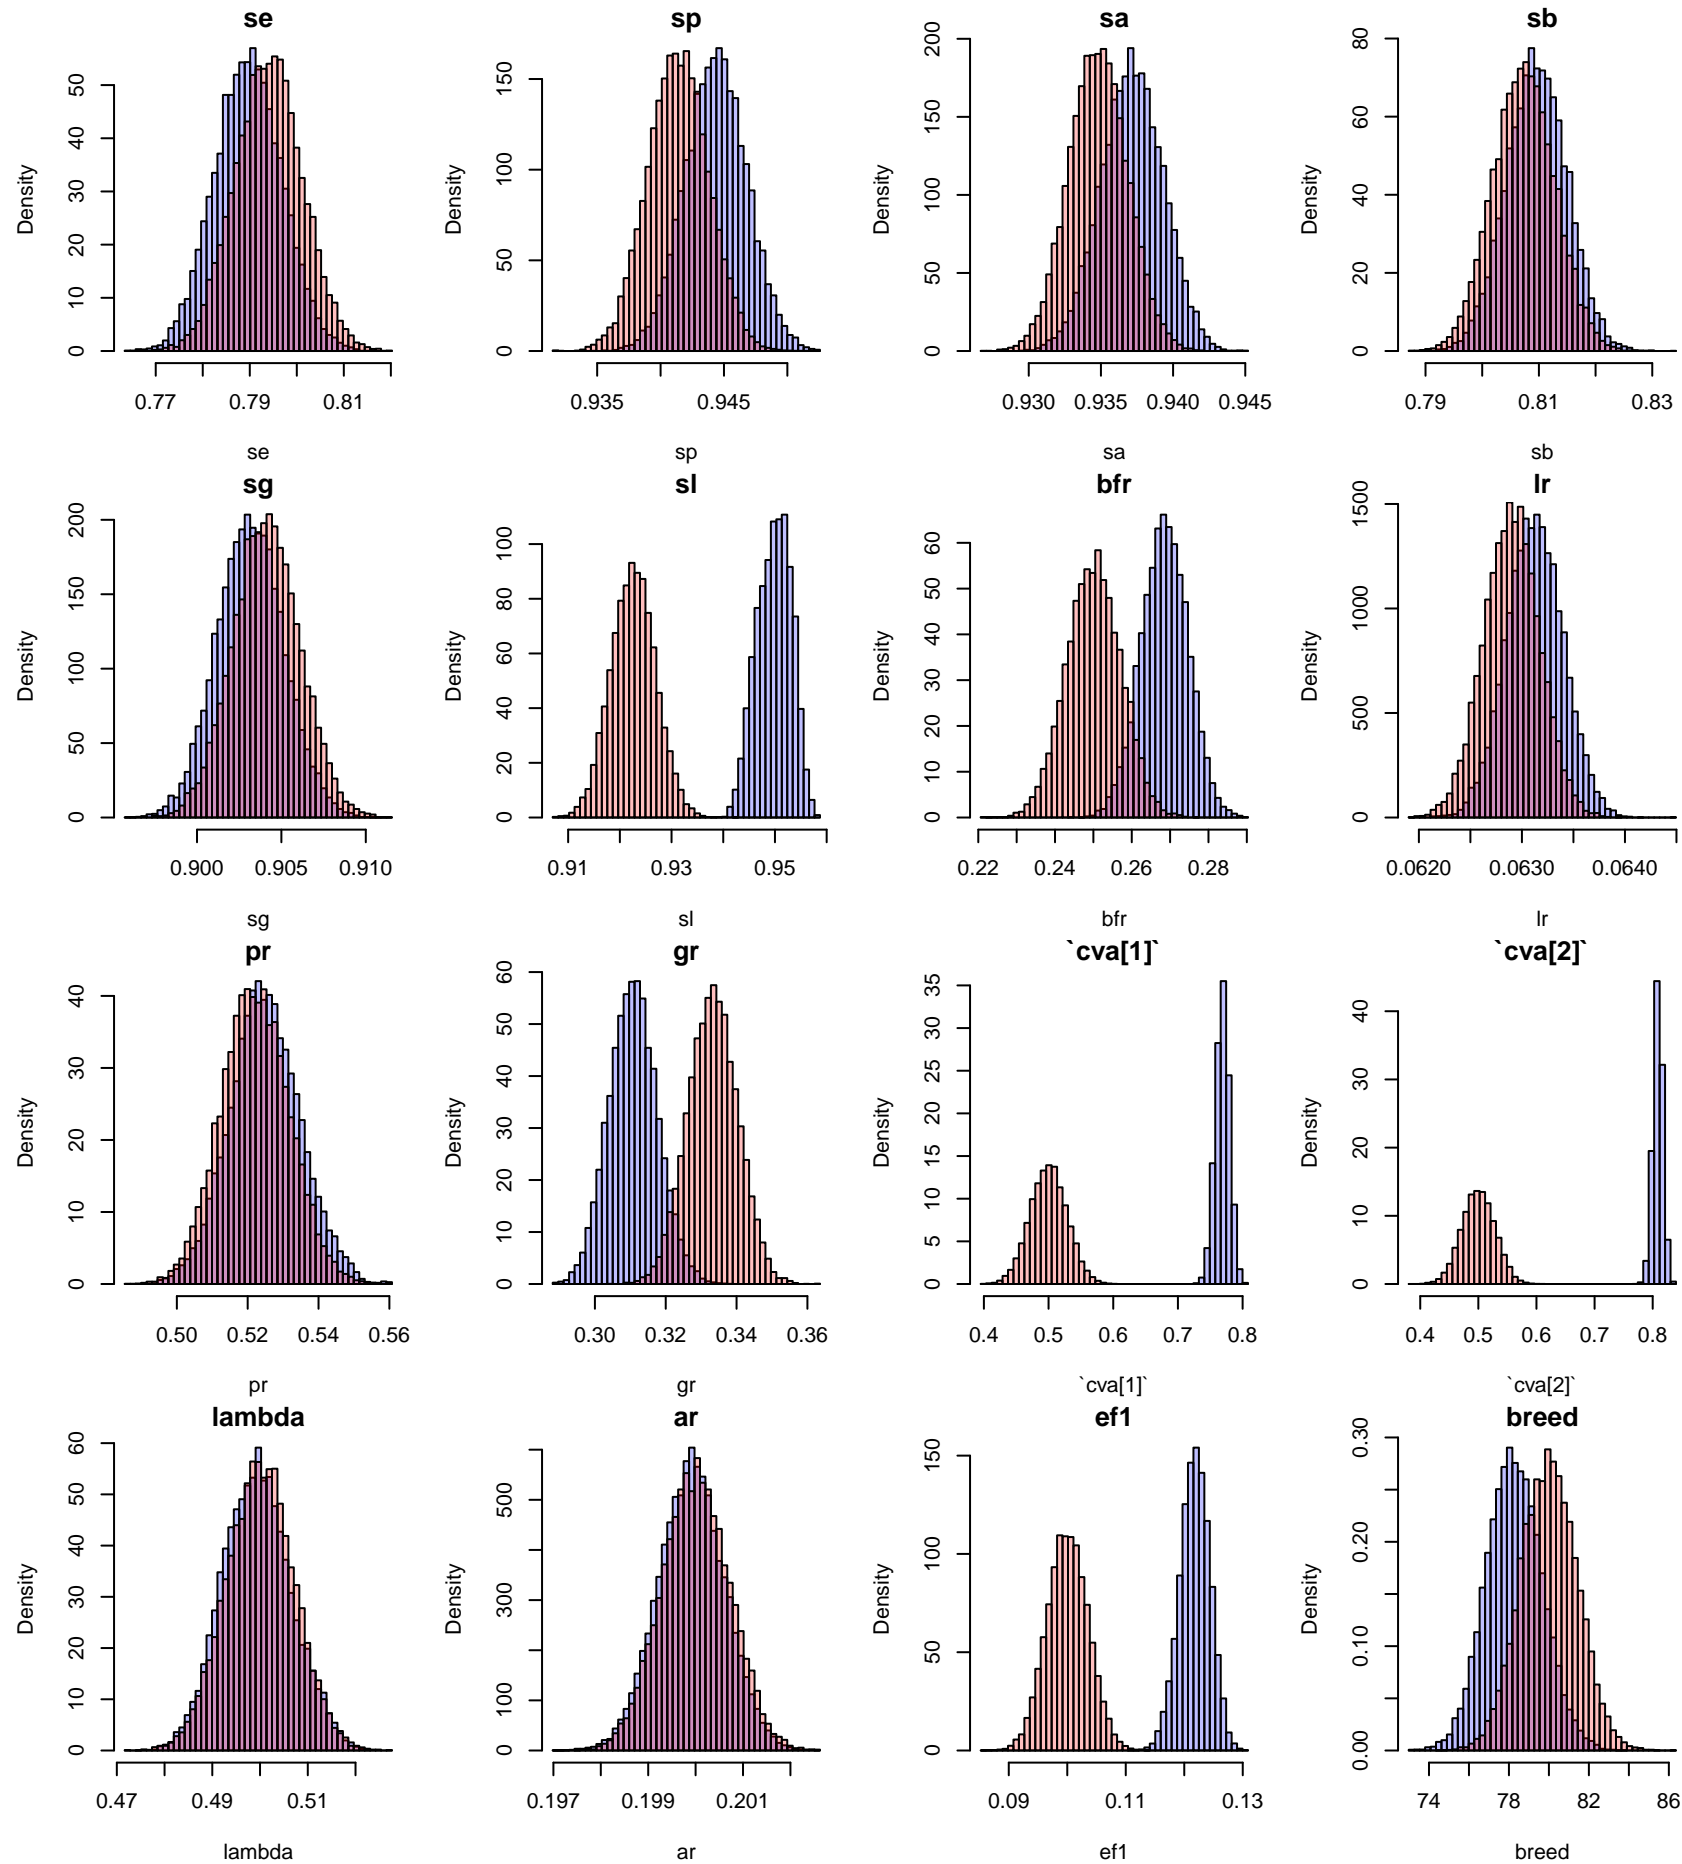

**Figure S3.2:** Prior (orange histogram) and posterior (blue histogram) distribution of the main environmental covariates parameters in the state-space model.

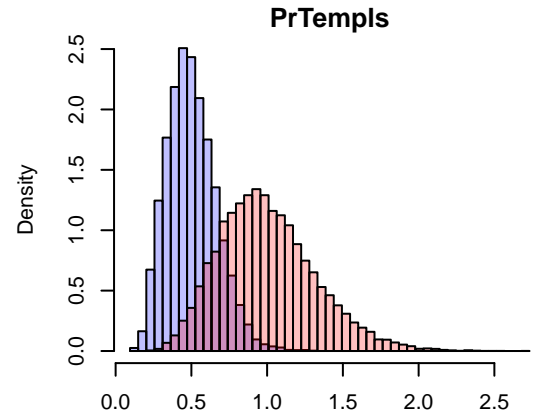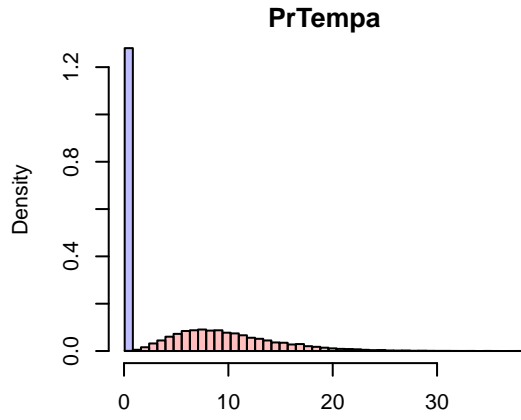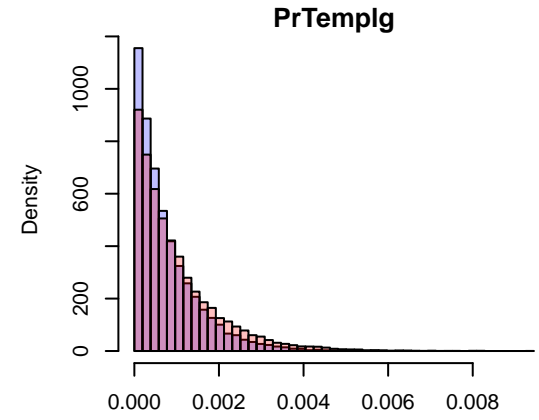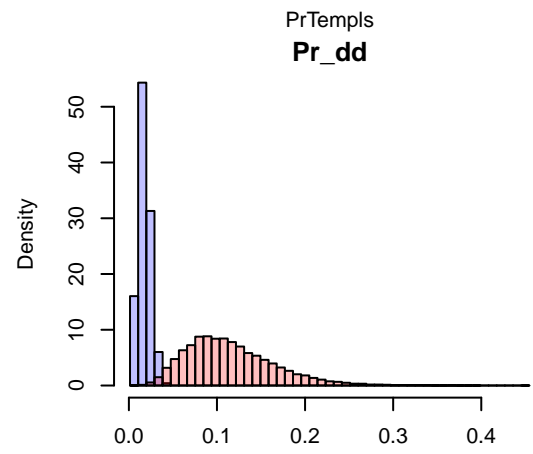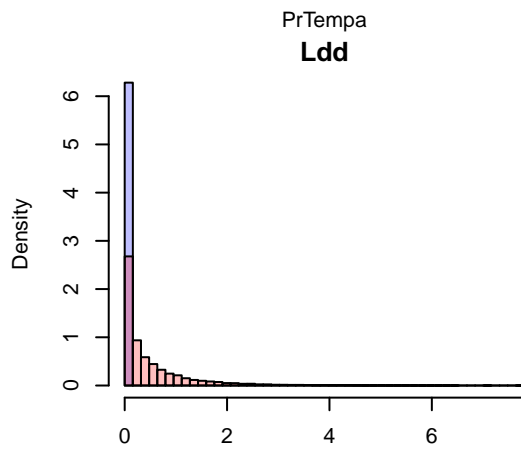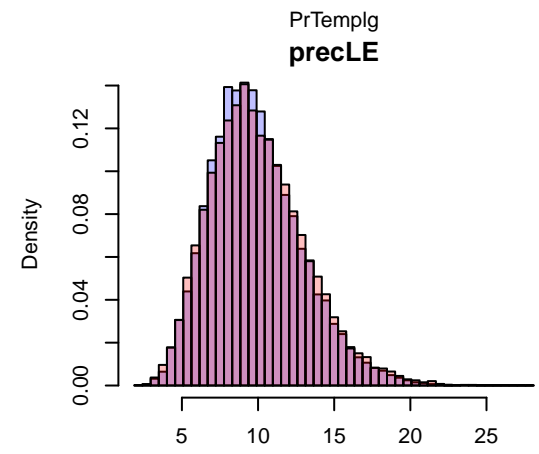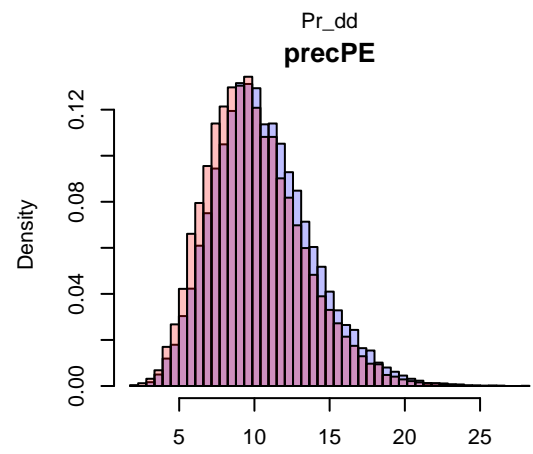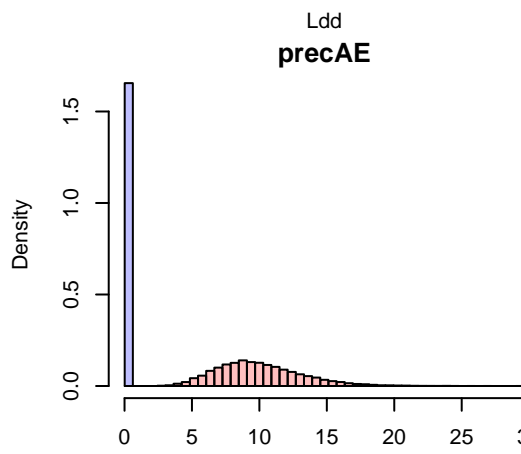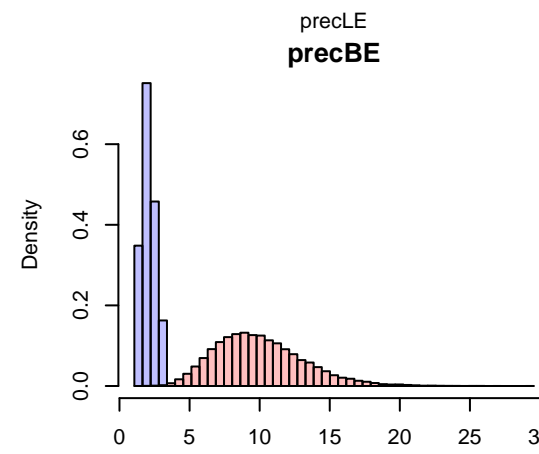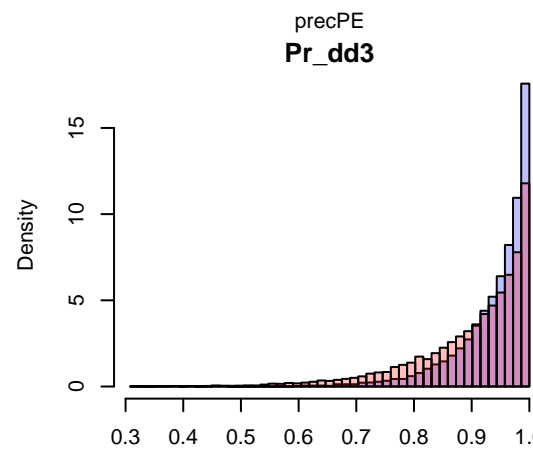

Supplement: 12936_2022_4189_MOESM1_ESM.pdf [file 12936_2022_4189_MOESM1_ESM.pdf]
